# Supplementary material
Source: Springer Nature journal article supplement (https://www.springermedizin.de/resource/supplementary/12885_2004_188_MOESM3_ESM.pdf/9469112)

# HMMer E-values / Uniref 90%

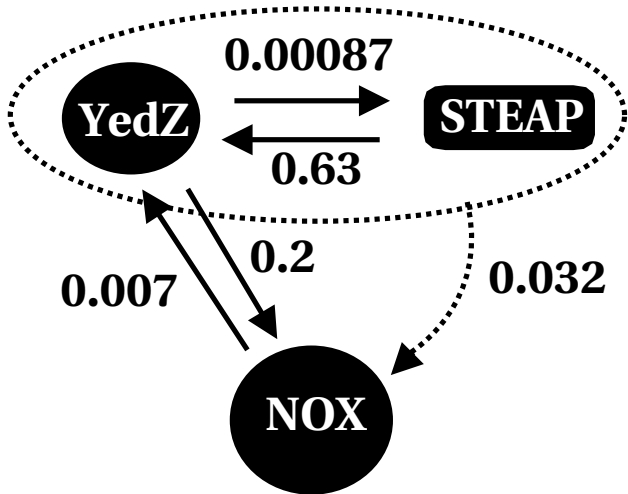

Supplement: MOESM3 [file 9469112]
